# Supplementary material for: Prognostic Index for Predicting Prostate Cancer Survival in a Randomized Screening Trial: Development and Validation
Source: MDPI journal article supplement (doi:10.3390/cancers13030435), 2021-01-24
Supplement: s1 [file s1]

# Supplementary materials: Prognostic index for predicting prostate cancer survival in a randomized screening trial: Development and validation

Subas Neupane \*, Jaakko Nevalainen, Jani Raitanen MSc, Kirsi Talala, Paula Kujala, Kimmo Taari, Teuvo Tammela, Ewout W. Steyerberg and Anssi Auvinen

**Table S1.** Prognostic factors for prostate cancer mortality from the prediction model. Estimates from the complementary log-log regression model with their 95% confidence intervals in different time periods.

| Characteristics               | Regression coefficient, $\beta$ (95% CI) |         |                       |         |                        |         |
|-------------------------------|------------------------------------------|---------|-----------------------|---------|------------------------|---------|
|                               | 0-3 years                                | p-value | 3-9 years             | p-value | 9-20 years             | p-value |
| <b>Age at diagnosis</b>       | -0.02 (-0.08 to 0.05)                    | 0.581   | -0.03(-0.07 to 0.01)  | 0.195   | -0.10 (-0.15 to -0.05) | <0.001  |
| <b>Study arm</b>              |                                          |         |                       |         |                        |         |
| Control                       | Ref                                      |         | Ref                   |         | Ref                    |         |
| Screening                     | -0.25 (-6.04 to -5.54)                   | 0.933   | 1.04 (-2.71 to 4.80)  | 0.586   | -2.08 (-6.43 to 2.28)  | 0.350   |
| <b>PSA at diagnosis</b>       | 0.15 (-0.18 to 0.48)                     | 0.368   | -0.15 (-0.38 to 0.09) | 0.221   | 0.08 (-0.21 to 0.38)   | 0.582   |
| <b>EAU Risk group</b>         |                                          |         |                       |         |                        |         |
| Low                           | Ref                                      |         | Ref                   |         | Ref                    |         |
| Intermediate                  | 0.75 (-0.73 to 2.23)                     | 0.322   | 1.14 (0.59 to 1.69)   | <0.001  | 0.28 (-0.20 to 0.76)   | 0.259   |
| High                          | 1.94 (0.60 to 3.28)                      | 0.005   | 1.74 (1.13 to 2.34)   | <0.001  | 0.46 (-0.16 to 1.09)   | 0.146   |
| <b>Comorbidity index</b>      |                                          |         |                       |         |                        |         |
| 0                             | Ref                                      |         | Ref                   |         | Ref                    |         |
| 1+                            | 0.16 (-0.53 to 0.85)                     | 0.646   | -0.09 (-0.66 to 0.47) | 0.745   | -1.08 (-2.23 to 0.06)  | 0.067   |
| <b>Primary treatment</b>      |                                          |         |                       |         |                        |         |
| Radical Prostatectomy         | Ref                                      |         | Ref                   |         | Ref                    |         |
| Radiation                     | 0.09 (-0.75 to 0.93)                     | 0.839   | 1.51 (1.01 to 2.00)   | <0.001  | 1.33 (0.86 to 1.80)    | <0.001  |
| Hormonal                      | 1.56 (0.67 to 2.45)                      | 0.001   | 2.68 (2.09 to 3.27)   | <0.001  | 2.09 (1.38 to 2.80)    | <0.001  |
| Observation                   | -0.46 (-2.15 to 1.22)                    | 0.591   | 1.97 (1.26 to 2.68)   | <0.001  | 2.61 (0.89 to 2.33)    | <0.001  |
| No treatment                  | 3.19 (1.99 to 4.40)                      | <0.001  | NA                    |         | NA                     |         |
| <b>Biochemical recurrence</b> |                                          |         |                       |         |                        |         |
| No                            | Ref                                      |         | Ref                   |         | Ref                    |         |
| Yes                           | 0.77 (0.12 to 1.42)                      | 0.021   | 2.50 (2.10 to 2.93)   | <0.001  | 2.37 (1.86 to 2.89)    | <0.001  |
| Arm x age at diagnosis        |                                          | 0.889   |                       | 0.598   |                        | 0.321   |

NA: Not available.

**Table S2.** Distribution of prognostic index quintiles for the development period 0-3 years reclassified in new prognostic index quintiles for the validation period 3-6 years.

| Prognostic index 0 to 3 years | Prognostic index 3 to 6 years |             |             |             |             |
|-------------------------------|-------------------------------|-------------|-------------|-------------|-------------|
|                               | Q1                            | Q2          | Q3          | Q4          | Q5          |
| Q1                            | 445 (31.6%)                   | 850 (60.4%) | 86 (6.1%)   | 25 (1.8%)   | 1 (0.1%)    |
| Q2                            | 589 (42.7%)                   | 155 (11.2%) | 270 (19.6%) | 302 (21.9%) | 64 (4.6%)   |
| Q3                            | 196 (13.9%)                   | 298 (21.2%) | 716 (50.9%) | 52 (3.7%)   | 146 (10.4%) |
| Q4                            | 39 (2.8%)                     | 80 (5.8%)   | 212 (15.3%) | 479 (34.6%) | 576 (41.6%) |
| Q5                            |                               |             |             |             |             |
|                               | 23 (1.8%)                     | 14 (1.1%)   | 114 (8.9%)  | 517 (40.5%) | 608 (47.7%) |

**Table S3.** Risk score at diagnosis for Pca survival based on the complementary log-log regression model among Pca diagnosis cases among both arm of the trial.

| Characteristics                 | Categories   | $\beta^{\dagger}$ | Risk score <sup>§</sup> |
|---------------------------------|--------------|-------------------|-------------------------|
| <b>Age at diagnosis (Years)</b> | ≤60          | 1.38              | 45                      |
|                                 | 61-70        | 1.22              | 40                      |
|                                 | 71-75        | 1.05              | 35                      |
|                                 | ≥76          | ref               | 0                       |
| <b>PSA at diagnosis (ng/ml)</b> | ≤19.9        | ref               | 0                       |
|                                 | ≥20.0        | 0.14              | 5                       |
| <b>EAU Risk group</b>           | Low          | ref               | 0                       |
|                                 | Intermediate | 0.76              | 25                      |
|                                 | High         | 1.62              | 50                      |

<sup>†</sup> Regression coefficients from complementary log-log model. <sup>§</sup> Risk score at baseline calculated dividing each beta coefficients by the sum of the highest beta coefficient of each variables and then multiplied by 100. (Scores are rounded).

**Table S4.** Risk score at diagnosis for Pca survival based on the complementary log-log regression model among Pca diagnosis cases in the control arm (complete case analysis).

| Characteristics                 | Categories   | $\beta^{\dagger}$ | Risk score <sup>§</sup> |
|---------------------------------|--------------|-------------------|-------------------------|
| <b>Age at diagnosis (Years)</b> | ≤60          | 1.07              | 40                      |
|                                 | 61-70        | 0.94              | 35                      |
|                                 | 71-75        | 0.67              | 25                      |
|                                 | ≥76          | ref               | 0                       |
| <b>PSA at diagnosis (ng/ml)</b> | ≤19.9        | ref               | 0                       |
|                                 | ≥20.0        | 0.27              | 10                      |
| <b>EAU Risk group</b>           | Low          | ref               | 0                       |
|                                 | Intermediate | 0.66              | 25                      |
|                                 | High         | 1.36              | 50                      |

<sup>†</sup> Regression coefficients from complementary log-log model. <sup>§</sup> Risk score at baseline calculated dividing each beta coefficients by the sum of the highest beta coefficient of each variables and then multiplied by 100. (Scores are rounded).

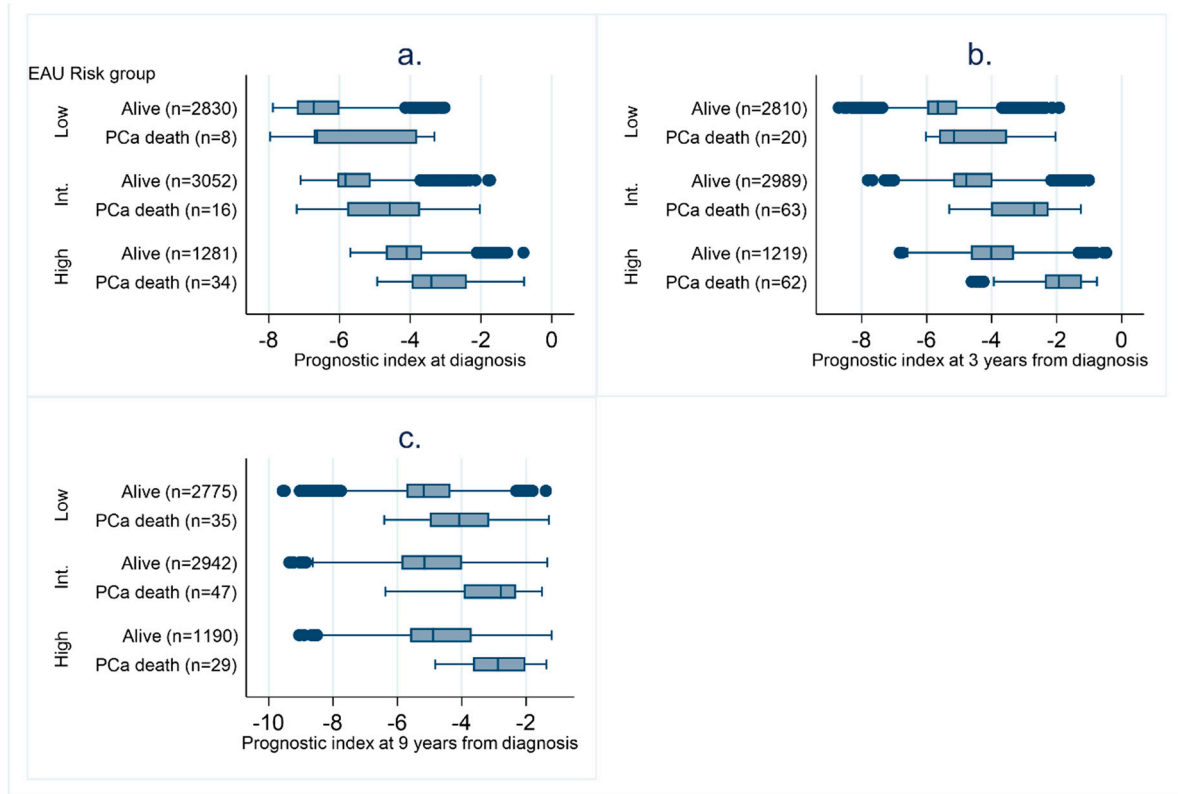

**Figure S1.** Box plots showing the distribution of the prognostic index by EAU risk groups and by period (a) 0 to 3 years, (b) 3 to 9 years and (c) 9 to 20 years.

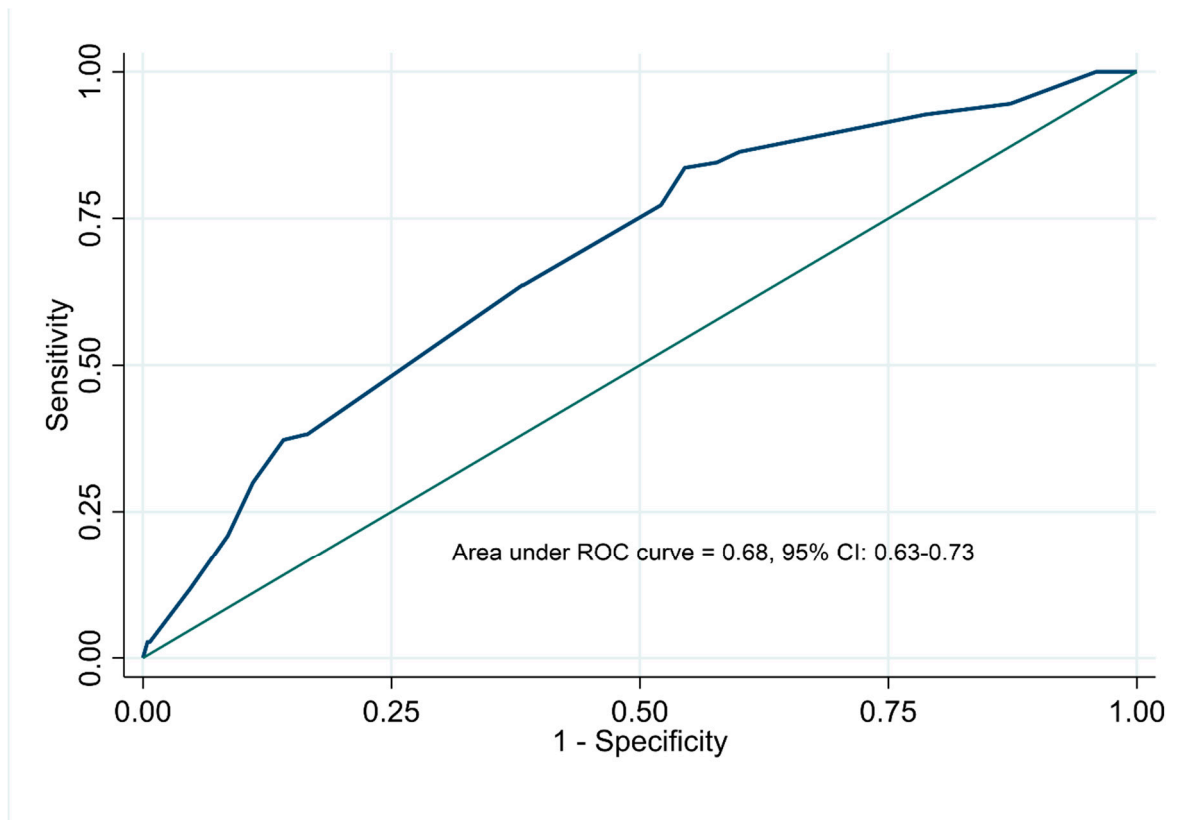

**Figure S2.** ROC curve for the simplified risk score at diagnosis.

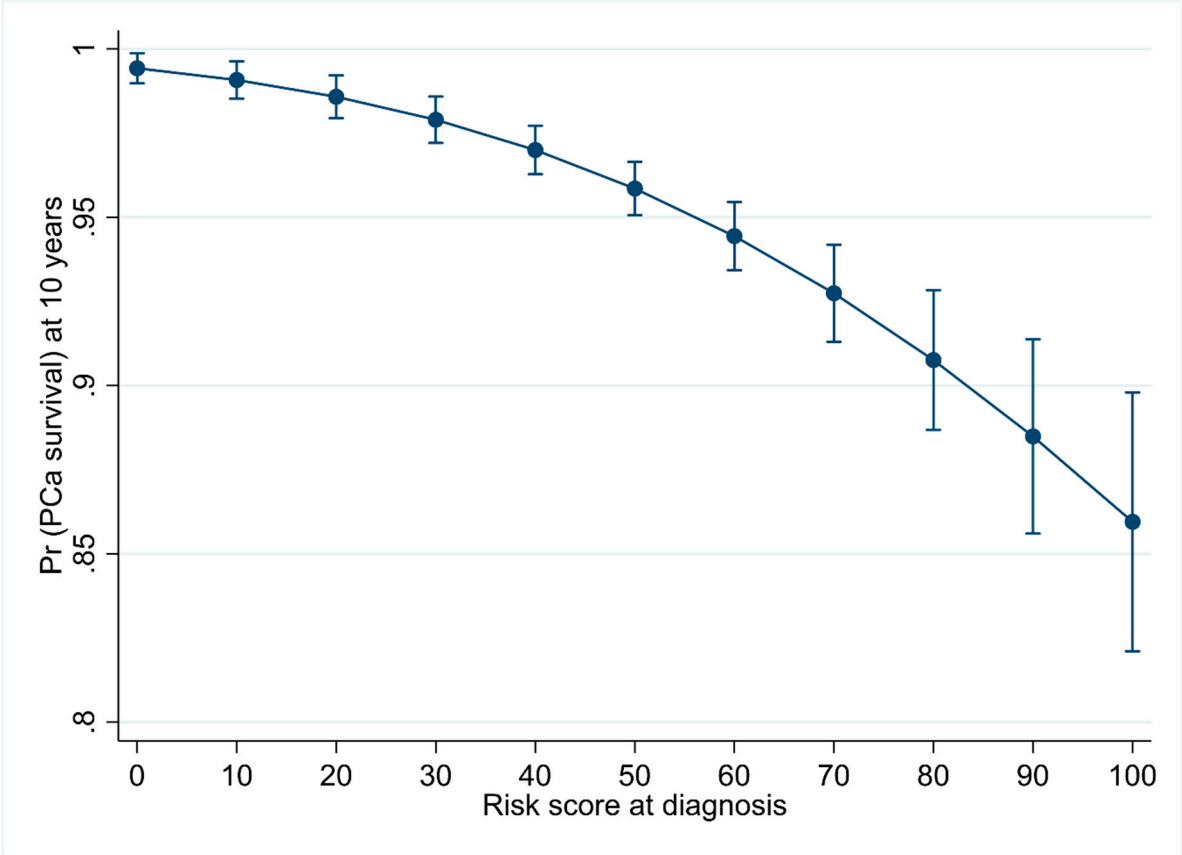

**Figure S3.** Predicted probability of PCa survival at 10-year from diagnosis among controls in a Finnish randomized screening trial (complete case analysis).
